# Supplementary material for: Altered splicing associated with the pathology of inflammatory bowel disease
Source: PubMed Central journal article supplement (PMC8305504; doi:10.1186/s40246-021-00347-y), 2021-07-23
Supplement: 40246_2021_347_MOESM3_ESM.pdf [file 40246_2021_347_MOESM3_ESM.pdf]

**a**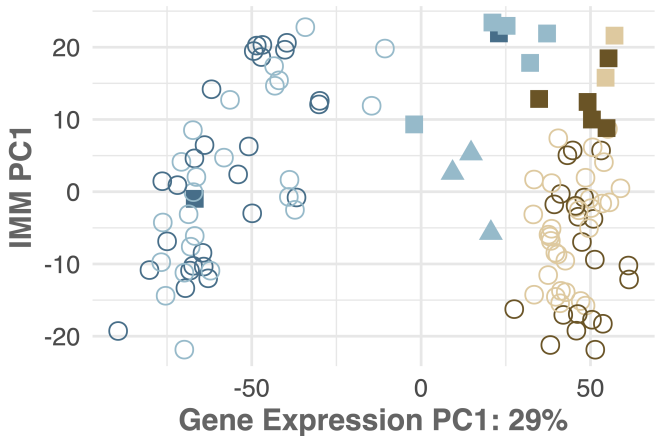**b**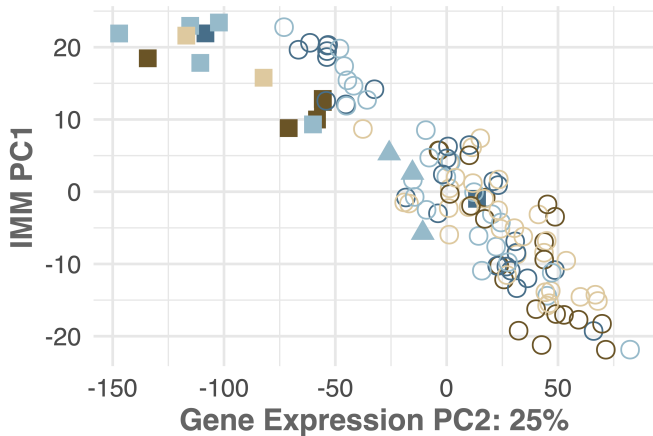**c**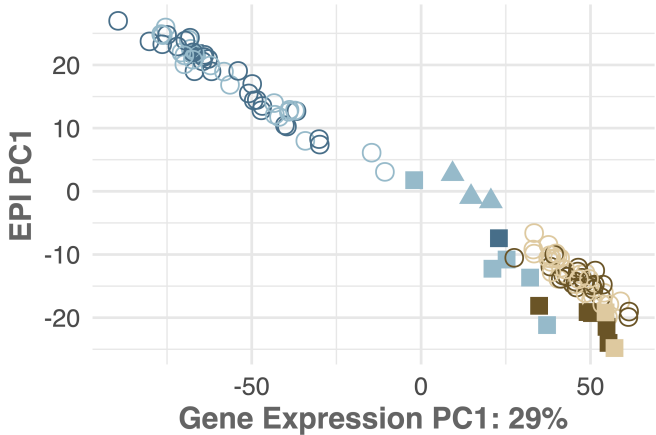**d**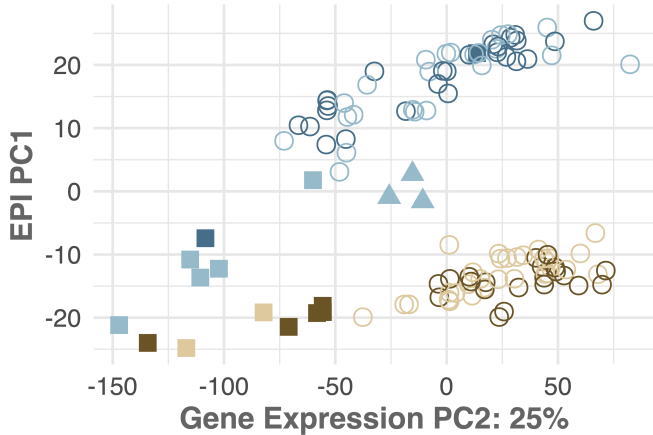**e**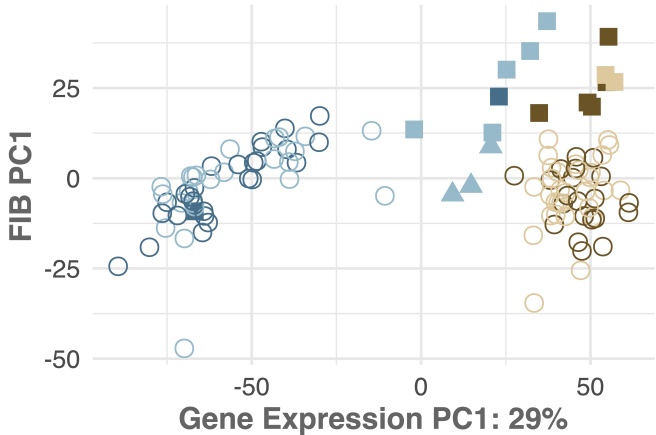**f**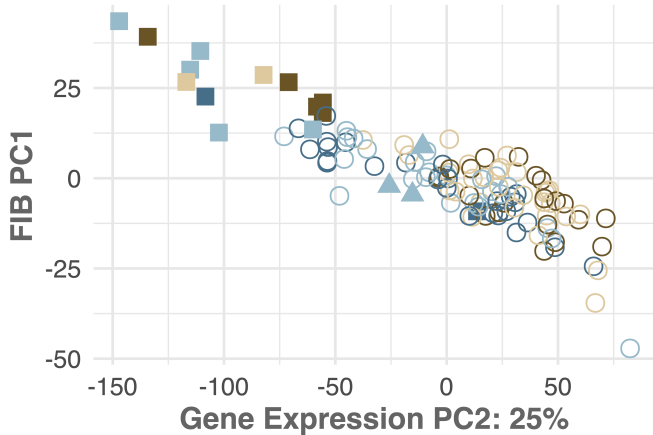

tissue location  
& disease type

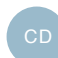

ileum

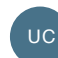

UC

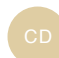

ileum

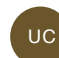

UC

rectum

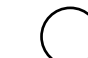

differentiated

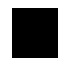

intermediate

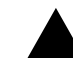

spliceopathy

rna cluster  
classification
