# Supplementary material for: Altered splicing associated with the pathology of inflammatory bowel disease
Source: PubMed Central journal article supplement (PMC8305504; doi:10.1186/s40246-021-00347-y), 2021-07-23

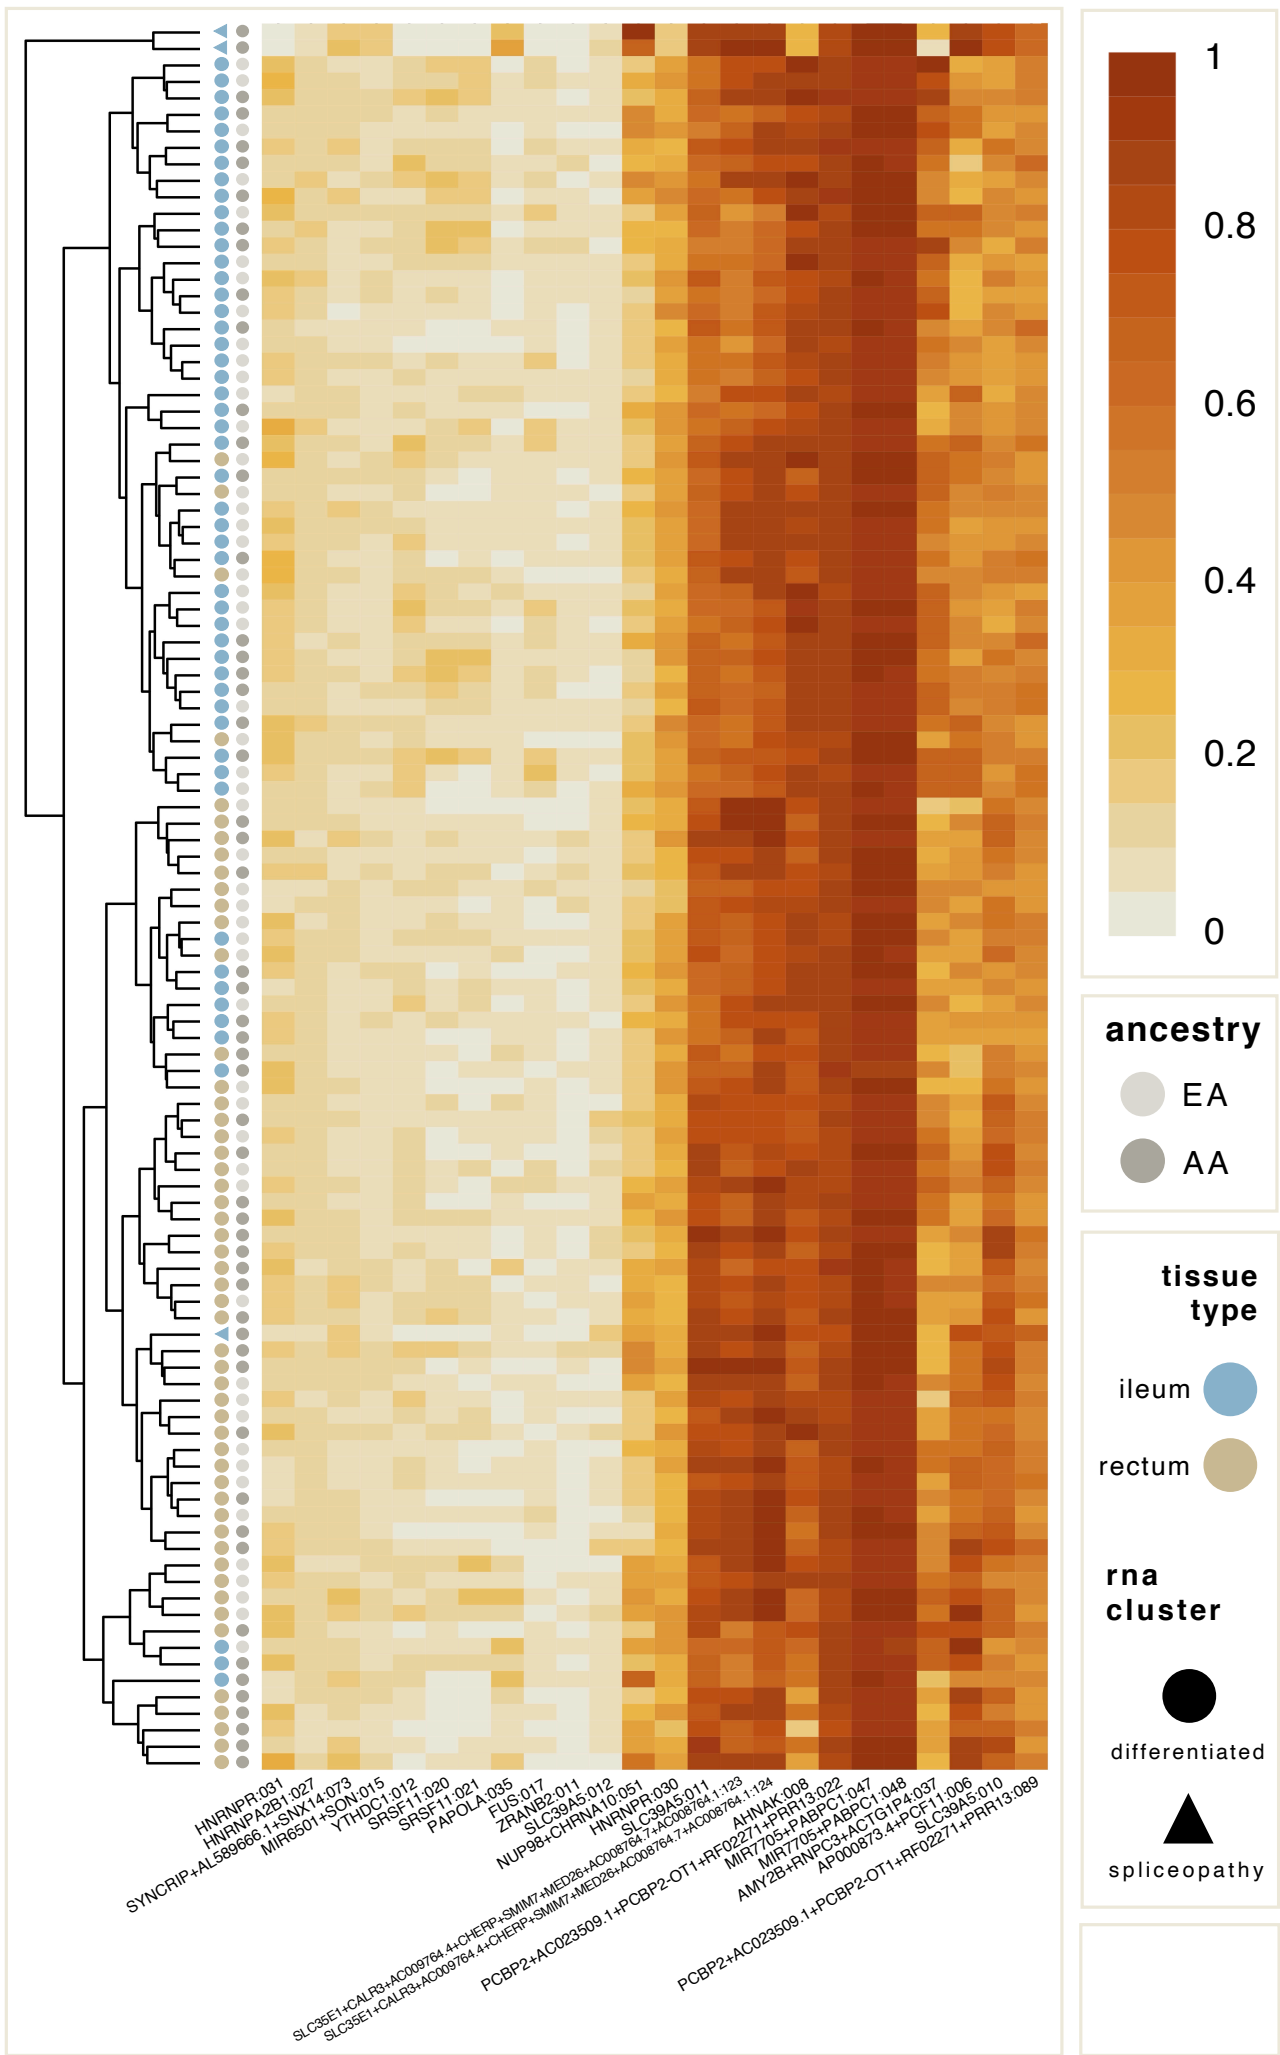

Supplement: 40246_2021_347_MOESM4_ESM.pdf [file 40246_2021_347_MOESM4_ESM.pdf]
